# Supplementary material
Source: HighWire-hosted journal article supplement (https://fg.bmj.com/content/13/4/280)
Supplement: inline-supplementary-material-1 [file inline-supplementary-material-1.pdf]

**Table 2: Included sources**

| Authors                                                   | Location of Source | Year of publication | Title of Source                                                                                                                                                              | Type of source                   |
|-----------------------------------------------------------|--------------------|---------------------|------------------------------------------------------------------------------------------------------------------------------------------------------------------------------|----------------------------------|
| Allocca,M.,<br>Furfaro,F.,<br>Fiorino,G., et al.          | Italy, France      | 2020                | Point-of-care ultrasound in inflammatory bowel disease                                                                                                                       | Literature review article        |
| Smith, R., Taylor, K., Friedman, A., et al                | Australia          | 2020                | Inter-rater reliability of gastrointestinal ultrasound in the assessment of disease activity in patients with inflammatory bowel disease prior to commencing medical therapy | Abstract (poster presentation)   |
| Bollegala, N.,<br>Griller, N.,<br>Bannerman, h., et al    | Canada             | 2019                | Ultrasound vs Endoscopy, Surgery, or Pathology for the Diagnosis of Small Bowel Crohn's Disease and its Complications                                                        | Literature review article        |
| Fraquelli, M.,<br>Castiglione, F.<br>Calabrese, E., et al | Italy              | 2019                | Impact of intestinal ultrasound on the management of patients with inflammatory bowel disease: how to apply scientific evidence to clinical practice                         | Literature review article        |
| Grunshaw, N.D                                             | UK                 | 2019                | Initial experience of a rapid-access ultrasound imaging service for inflammatory bowel disease                                                                               | Clinical practice review article |
| Lamb, C.,<br>Kennedy, N.,<br>Raine, T., et al             | UK                 | 2019                | British Society of Gastroenterology consensus guidelines on the management of inflammatory bowel disease in adults                                                           | Clinical Practice Guidelines     |
| Maaser, C., Sturm, A., Vavricka, S.R., et al              | Europe wide        | 2019                | ECCO-ESGAR Guideline for Diagnostic Assessment in IBD Part 1: Initial diagnosis, monitoring of known IBD, detection of complications                                         | Clinical practice guidelines     |
| Panaccione,R.,<br>Steinhart, A.H,<br>Bressler,B. et al    | Canada             | 2019                | Canadian Association of Gastroenterology Clinical Practice Guideline for the Management of Luminal Crohn's Disease                                                           | Clinical Practice Guidelines     |

|                                                   |                         |      |                                                                                                                                                                                             |                                  |
|---------------------------------------------------|-------------------------|------|---------------------------------------------------------------------------------------------------------------------------------------------------------------------------------------------|----------------------------------|
| Yuksel, I., Kilincalp, S., Coskun, Y., et al      | Turkey                  | 2019 | Diagnostic accuracy of intestinal ultrasound and magnetic resonance enterography for the detection of endoscopy-based disease activity in ileocolonic Crohn's disease                       | Cross sectional study            |
| Bots, S., Nylund, K., Lowenberg, M., et al        | Norway, The Netherlands | 2018 | Ultrasound for assessing disease activity in IBD patients: a systematic review of activity scores                                                                                           | Literature review article        |
| Bryant, R.V., Friedman, A.B., Wright, E.K., et al | Australia               | 2018 | Gastrointestinal ultrasound in inflammatory bowel disease: an underused resource with potential paradigm-changing application                                                               | Clinical practice review article |
| Kucharzik, T. and Maaser, C.                      | Germany                 | 2018 | Intestinal ultrasound and management of small bowel Crohn's disease                                                                                                                         | Clinical practice review article |
| Lichtenstein, G., Loftus, E., Isaacs, K. et al    | USA                     | 2018 | ACG Clinical Guideline: Management of Crohn's Disease in Adults                                                                                                                             | Clinical Practice Guidelines     |
| Miles, A., Bhatnagar, G., Halligam, S. et al      | UK                      | 2018 | Magnetic resonance enterography, small bowel ultrasound and colonoscopy to diagnose and stage Crohn's disease: patient acceptability and perceived burden                                   | Cross sectional study            |
| Taylor, S., Mallett, S., Bhatnagar, G., et al     | UK                      | 2018 | Diagnostic accuracy of magnetic resonance enterography and small bowel ultrasound for the extent and activity of newly diagnosed and relapsed Crohn's disease (METRIC): a multicentre trial | Cross sectional study            |
| Conti, C.B., Giunta, M., Gridavilla, D., et al    | Italy                   | 2017 | Role of bowel ultrasound in the diagnosis and follow up of patients with Crohn's Disease.                                                                                                   | Literature review article        |
| Kucharzik, T., Kannengiesser, K. and Petersen, F. | Germany                 | 2017 | The use of ultrasound in inflammatory bowel disease                                                                                                                                         | Literature review article        |

|                                                           |                                    |      |                                                                                                                                                         |                                  |
|-----------------------------------------------------------|------------------------------------|------|---------------------------------------------------------------------------------------------------------------------------------------------------------|----------------------------------|
| Kucharzik, T., Wittig, B., Helwig, U., et al              | Germany                            | 2017 | Use of intestinal ultrasound to monitor Crohn's Disease Activity.                                                                                       | Cross sectional study            |
| Novak, K.L., Kaplan, G.G, Panaccione, R.                  | Canada                             | 2017 | A simple ultrasound score for the accurate detection of inflammatory activity in Crohn's disease                                                        | Cross sectional study            |
| Taylor, S.A., Avni, F., Cronin, C.G. et al                | Europe Wide                        | 2017 | The first joint ESGAR/ ESPR consensus statement on the technical performance of cross-sectional small bowel and colonic imaging                         | Delphi survey study              |
| Calabrese, E., Maaser, C., Zorzi, F., et al               | International: Canada, USA, Europe | 2016 | Bowel Ultrasonography in the Management of Crohn's Disease. A Review with Recommendations of an International Panel of Experts                          | Literature review article        |
| Ripolles, T., Paredes, J.M, Martininez-Perez, M.J., et al | Spain                              | 2016 | Ultrasonographic changes at 12 weeks of anti-TNF drugs predict 1-year sonographic response and clinical outcome in Crohn's disease: a multicentre study | Cohort study                     |
| Wilkens, R., Novak, K.L., Lebuf-Taylor, E., et al         | Canada/Denmark                     | 2016 | Impact of Intestinal Ultrasound on Classification and Management of Crohn's Disease Patients with Inconclusive Colonoscopy                              | Cross sectional                  |
| Calabrese, E., Zorzi, F., Lilli, E., et al                | Italy                              | 2015 | Positioning Ultrasonography Into Clinical Practice for the Management of Crohn's Disease                                                                | Clinical practice review article |
| Novak, K., Tanyingoh, D., Petersen, F., et al             | Canada                             | 2015 | Clinic-based Point of Care Transabdominal Ultrasound for Monitoring Crohn's Disease: Impact on Clinical Decision Making                                 | Cross sectional study            |
| Castiglione, F., Mainenti, P., De Palma, G.D., et al      | Italy                              | 2013 | Non-invasive Diagnosis of Small Bowel Crohn's Disease: Direct Comparison of Bowel Sonography and Magnetic Resonance Enterography                        | Cross sectional study            |
| Castiglione, F., Testa, A., Rea, M., et al                | Italy                              | 2013 | Transmural healing evaluated by bowel sonography in patients with Crohn's disease on maintenance treatment with biologics                               | Cohort study                     |

|                                                   |                                                    |      |                                                                                                                                                                                                                |                                          |
|---------------------------------------------------|----------------------------------------------------|------|----------------------------------------------------------------------------------------------------------------------------------------------------------------------------------------------------------------|------------------------------------------|
| Novak, K.L. and Wilson, S.R.                      | Canada                                             | 2012 | Sonography for surveillance of patients with Crohn Disease                                                                                                                                                     | Case report and clinical practice review |
| Calabrese, E., Zorzi, F. and Pallone, F.          | Italy                                              | 2011 | Ultrasound of the small bowel in Crohn's Disease                                                                                                                                                               | Literature review article                |
| Hafeez, R., Greenhalgh, R., Rajan, J., et al      | UK                                                 | 2011 | Use of small bowel imaging for the diagnosis and staging of Crohn's disease – a survey of current UK practice                                                                                                  | Survey study                             |
| Girlich, C., Ott, C., Strauch, U., et al          | Germany                                            | 2010 | Clinical feature and bowel ultrasound in Crohn's disease - does additional information from magnetic resonance imaging affect therapeutic approach and when does extended diagnostic investigation make sense? | Cross sectional study                    |
| Calabrese, E., Kucharzik, T., Maaser, C., et al   | International: Italy, Germany, USA, Canada, Japan. | 2006 | Real-time Interobserver Agreement in Bowel Ultrasonography for Diagnostic Assessment in Patients With Crohn's Disease: An International Multicenter Study                                                      | Cross sectional study                    |
| Maconi, G., Radice, E., Greco, S., et al          | Italy                                              | 2006 | Bowel ultrasound in Crohn's disease                                                                                                                                                                            | Clinical practice review article         |
| Calabrese, E., La Seta, F., Buccellato, A., et al | Italy                                              | 2005 | Crohn's Disease: A Comparative Prospective Study of Transabdominal Ultrasonography, Small Intestine Contrast Ultrasonography, and Small Bowel Enema                                                            | Cross sectional study                    |
| Pascu, M., Roznowski, A.B., Muller, H.P., et al   | Germany                                            | 2004 | Clinical Relevance of Transabdominal Ultrasonography and Magnetic Resonance Imaging in Patients With                                                                                                           | Cross sectional study                    |

|                                                        |             |      | Inflammatory Bowel Disease of the Terminal Ileum and Large Bowel                                                                                                            |                           |
|--------------------------------------------------------|-------------|------|-----------------------------------------------------------------------------------------------------------------------------------------------------------------------------|---------------------------|
| Sturm, E.J.C., Cobben, L.P.J., Meijssen, M.A.C., et al | Netherlands | 2004 | Detection of ileocecal Crohn's disease using ultrasound as the primary imaging modality                                                                                     | Cross sectional study     |
| Maconi, G., Carsana, L., Fociani, P., et al            | Italy       | 2003 | Small bowel stenosis in Crohn's disease: clinical, biochemical and ultrasonographic evaluation of histological features                                                     | Cross sectional study     |
| Parente, F., Maconi, G., Bollani, S., et al            | Italy       | 2002 | Bowel ultrasound in assessment of Crohn's disease and detection of related small bowel strictures: a prospective comparative study versus x-ray and intraoperative findings | Cross sectional study     |
| Potthast, S., Rieber, A., Von Tirpitz, C., Et al       | Denmark     | 2001 | Ultrasound and magnetic resonance imaging in Crohn's disease: a comparison                                                                                                  | Cross sectional study     |
| Valette, P.J., Rioux, M., Pilleul, F., et al           | France      | 2001 | Ultrasonography of chronic inflammatory bowel diseases                                                                                                                      | Literature review article |
| Tarjan, Z., Toth, G., Gyorke, T., et al                | Hungary     | 2000 | Ultrasound in Crohn's disease of the small bowel                                                                                                                            | Case series study         |
| Hollerbach, S., Geissler, H., Schiegl, H., et al       | Germany     | 1998 | The accuracy of abdominal ultrasound in the assessment of bowel disorders                                                                                                   | Cross sectional study     |
